# Supplementary material for: Circulating Tumor and Invasive Cell Gene Expression Profile Predicts Treatment Response and Survival in Pancreatic Adenocarcinoma
Source: PubMed Central journal article supplement (PMC6315371; doi:10.3390/cancers10120467), 2018-11-24
Supplement: cancers-10-00467-s001.pdf [file cancers-10-00467-s001.pdf]

# Supplementary Materials: Circulating Tumor and Invasive Cell Gene Expression Profile Predicts Treatment Response and Survival in Pancreatic Adenocarcinoma

Kenneth H. Yu, Mark Ricigliano, Brian McCarthy, Joanne F. Chou, Marinela Capanu, Brandon Cooper, Andrew Bartlett, Christina Covington, Maeve A. Lowery and Eileen M. O'Reilly

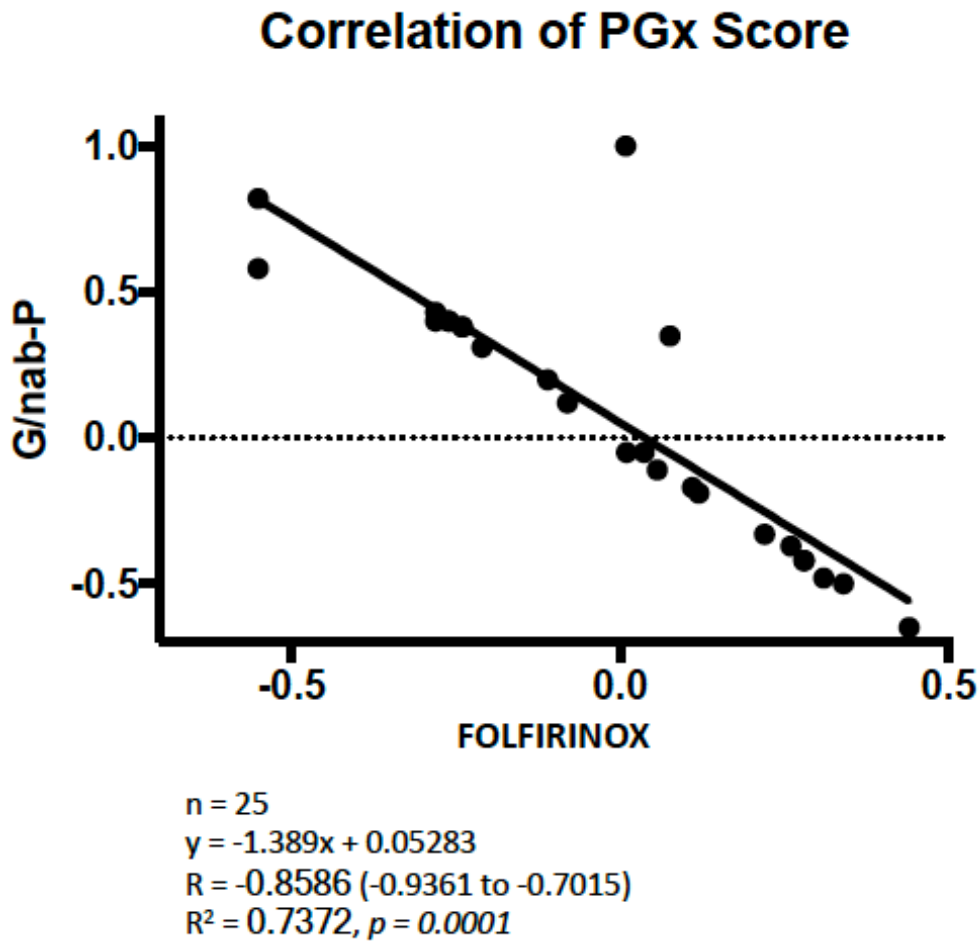

**Figure S1.** Correlation of PGx score comparing FOLFIRINOX and G/nab-P pairwise for each study participant.

**Table S1.** Gene families used for PGx model.

ABCA  
ABCB  
ABCC  
ABCD  
ABCF  
ABCG  
AQP  
MVP  
SLC2  
SLC3  
SLC5  
SLC7  
SLC10  
SLC15  
SLC16  
SLC22  
SLC28  
SLC29  
SLCO  
TAP  
VDAC
